# Supplementary material for: Restorable, high-strength poly(N-isopropylacrylamide) hydrogels constructed through chitosan-based dual macro-cross-linkers with rapid response to temperature jumps
Source: Royal Society of Chemistry journal article supplement (doi:10.1039/c7ra10148a), 2017-01-01
Supplement: c7ra10148a1.pdf [file c7ra10148a1.pdf]

## Supporting Information

### **Restorable, high-strength poly(N-isopropylacrylamide) hydrogels constructed through chitosan-based dual macro-cross-linkers with rapid response to temperature jump**

Xiaomei Ma<sup>1,\*</sup>, Rui Li<sup>1</sup>, Xianchen Lv<sup>1</sup>, Jie Ren<sup>1</sup>, Xihui Zhao<sup>1</sup>, Quan Ji<sup>2</sup>, Yanzhi Xia<sup>3</sup>

<sup>1</sup> *School of Chemistry and Chemical Engineering, Qingdao University, 308 Ningxia Road, Qingdao, Shandong 266071, P. R. China*

<sup>2</sup> *School of Materials Science and Engineering, Qingdao University, 308 Ningxia Road, Qingdao, Shandong 266071, P. R. China*

<sup>3</sup> *Collaborative Innovation Center for Marine Biomass Fibres, Materials and Textiles of Shandong Province, Qingdao University, 308 Ningxia Road, Qingdao, Shandong 266071, P. R. China*

---

\* Corresponding author.  
E-mail address: mxm@qdu.edu.cn

### ***Synthesis and characterization of methacryloylchitosan***

The employed methacryloylchitosan (MACS) was synthesized as follows. Chitosan was dissolved in aqueous solution of MAA by an equivalent  $\text{-NH}_2$  to  $\text{-COOH}$ , yielding a transparent solution on one side for later use. On the other side, equal moles of MAA, EDC and NHS were mixed with distilled water in a three-necked round-bottom glass flask under  $0\text{ }^\circ\text{C}$ . The solution was stirred for 1 h at  $0\text{ }^\circ\text{C}$ , followed by dropping of the afore-prepared chitosan solution. Finally, the reaction system was kept stirring at  $0\text{ }^\circ\text{C}$  for 30 min and 24 h at  $10\text{ }^\circ\text{C}$  continually. After the reaction, the reaction mixture was filtered; MACS was precipitated and washed several times with ethanol, then dried for further use. After the reaction, the product was precipitated from the reaction mixture with ethanol, and washed several times with ethanol to remove the impurities further.

The obtained MACS was freeze-dried further for 24 h and then embedded in KBr disks. The infrared spectrogram was recorded on a Nicolet 5700 spectrometer.

## Results and Discussion

### Supporting Figures

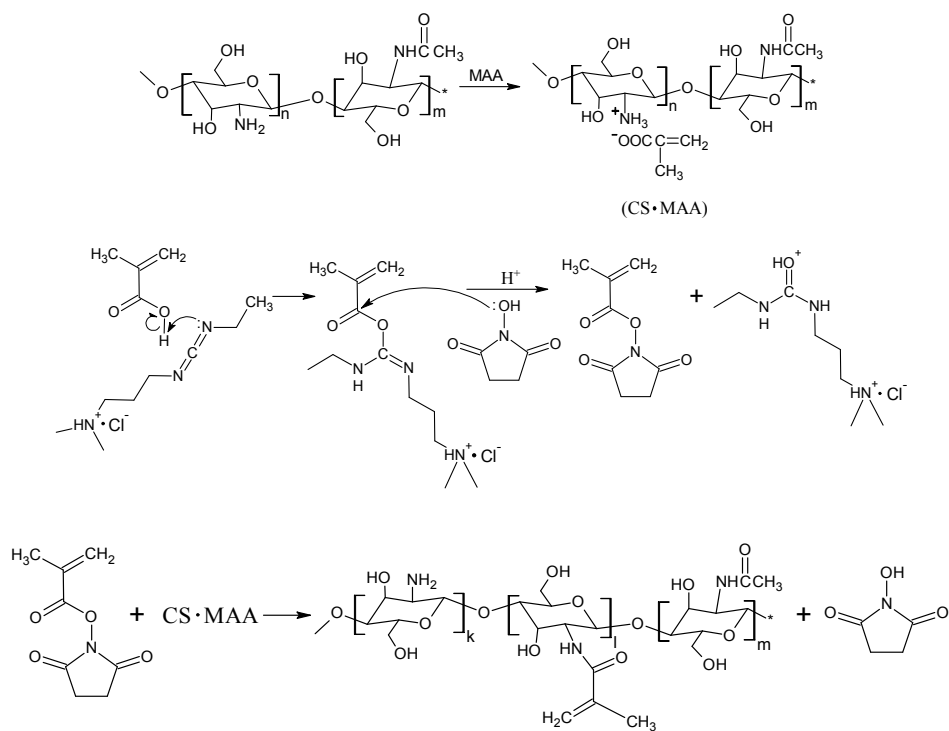

Fig. S11 Main reactions occurred during the synthesis of MACS

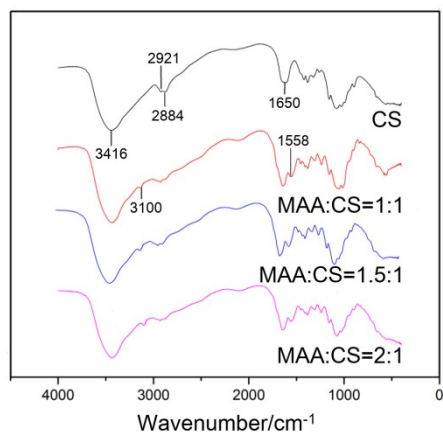

Fig. S12 IR spectrograms of CS and MACS synthesized under different molar ratio of MAA to CS

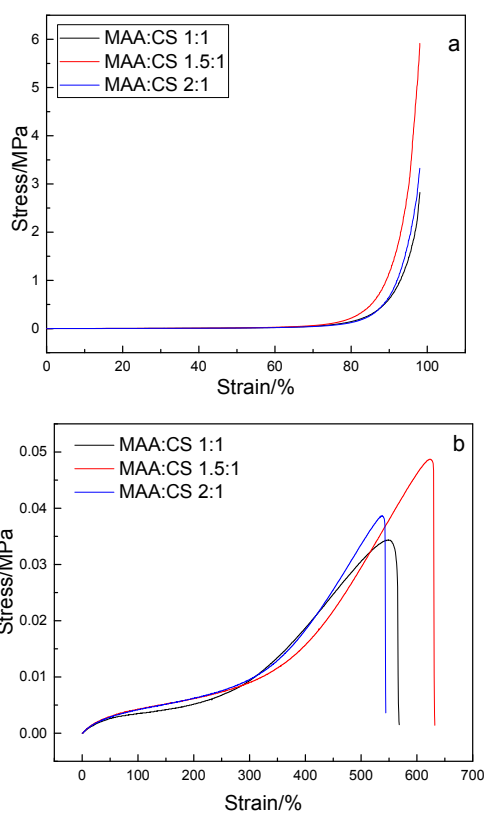

Fig. SI3 Compressive (a) and tensile (b) stress-strain curves of hydrogels prepared using MACS synthesized under different molar ratio of MAA to chitosan

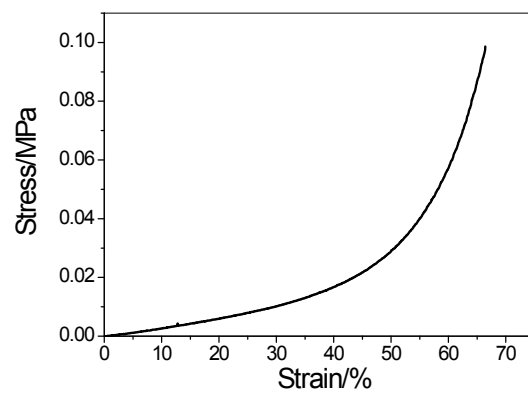

Fig. S14 Compressive stress-strain curves of pNIPAM hydrogel cross-linked by N,N'-methylenebisacrylamide (BIS) (Solids content 20 wt%, KPS 0.22 mol%, BIS 5.2 wt% to NIPAM)

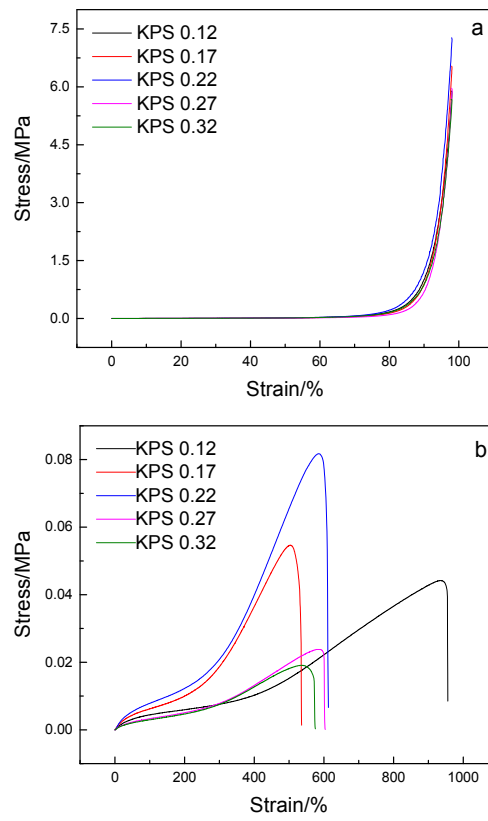

Fig. SI5 Compressive (a) and tensile (b) stress-strain curves of hydrogels prepared under the initiation of different amount of KPS
